# Supplementary material for: In Hepatocellular Carcinoma, miRNA-296-3p Targets MSL2 and Suppresses Cell Proliferation and Invasion
Source: Hindawi journal article supplement (doi:10.1155/2021/7430468), 2021-12-02
Supplement: f1 [file 7430468.f1.pdf]

HUH-7

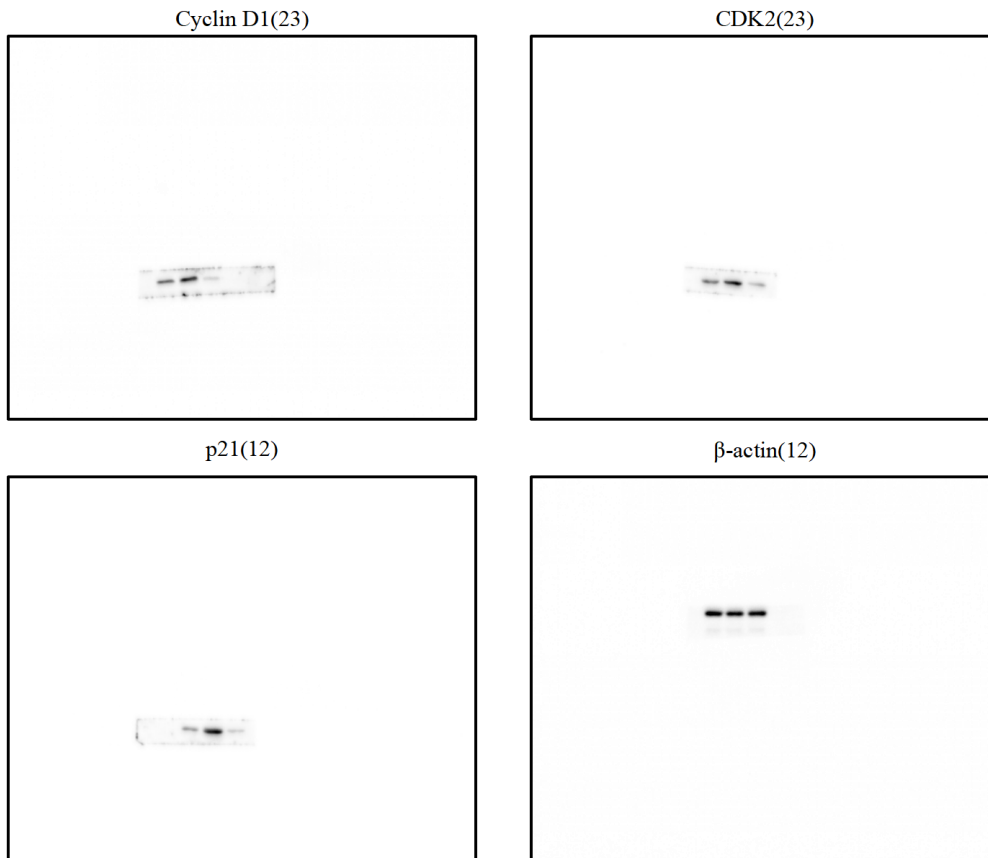

HepG2

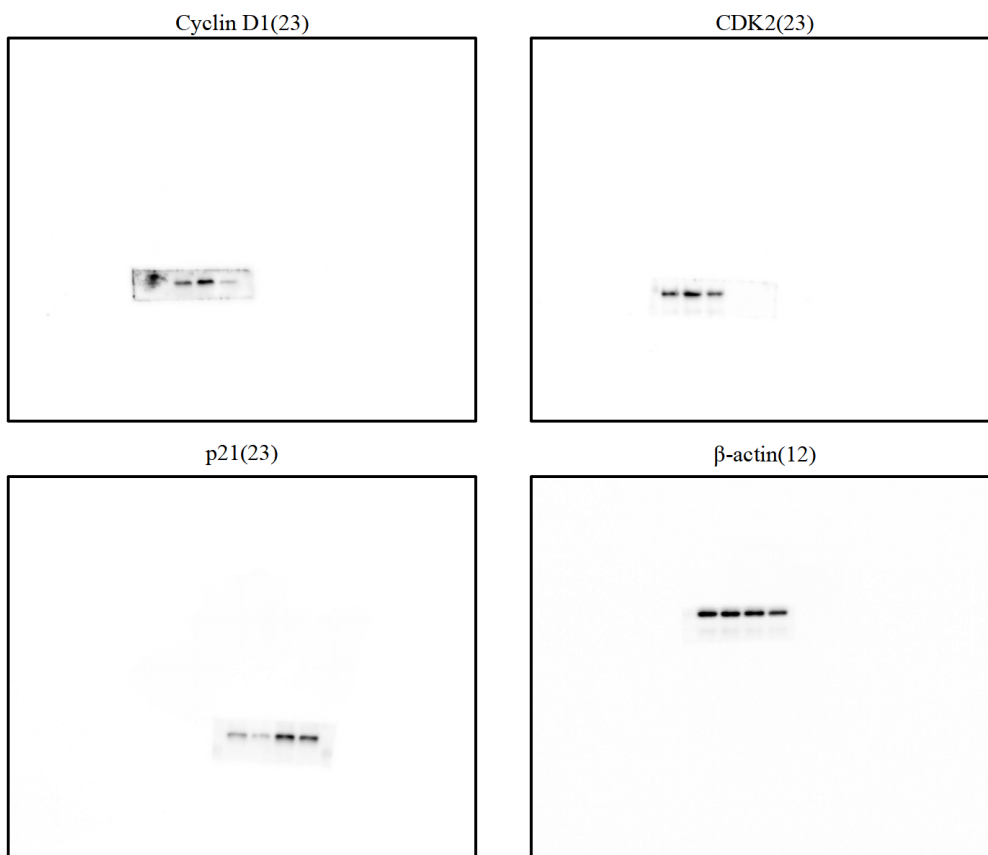

**Uncropped original picture of Western blot in Figure 2C.**

HUH-7

Cox-2(23)

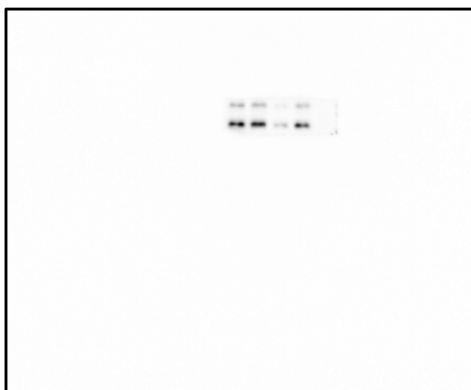

MMP2(23)

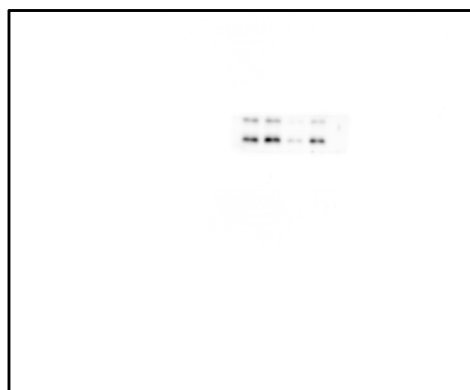

MMP9(23)

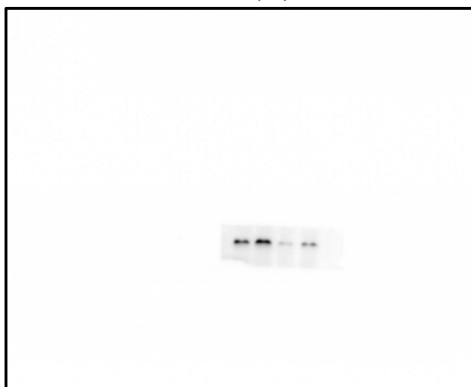

$\beta$ -actin(23)

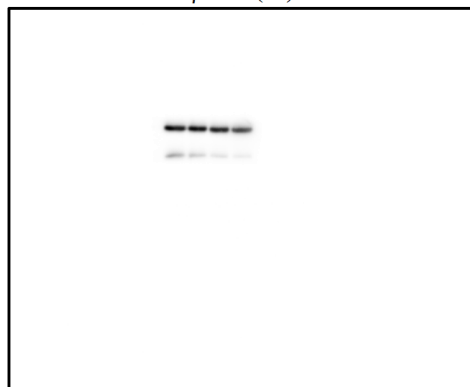

HepG2

Cox-2(23)

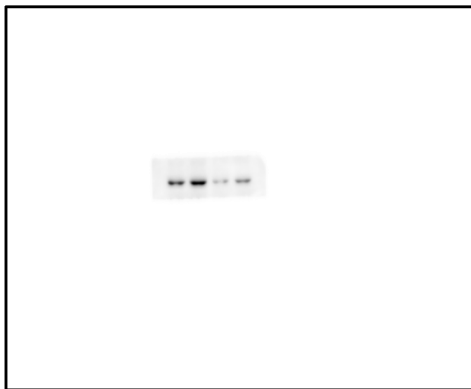

MMP2(23)

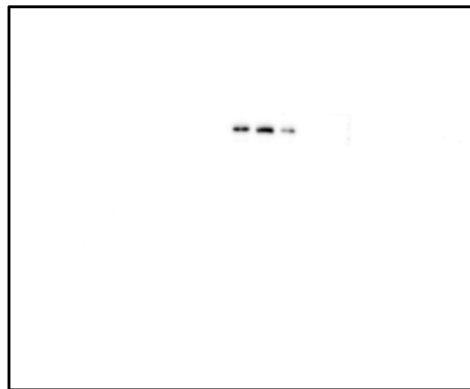

MMP9(23)

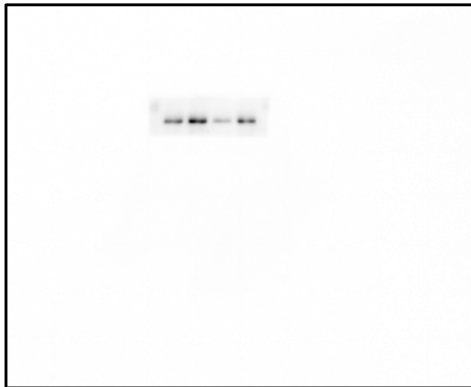

$\beta$ -actin(23)

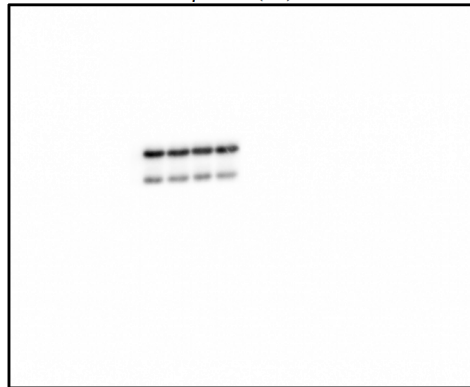

Uncropped original picture of Western blot in Figure 3C

HUH-7

MSL2(56)

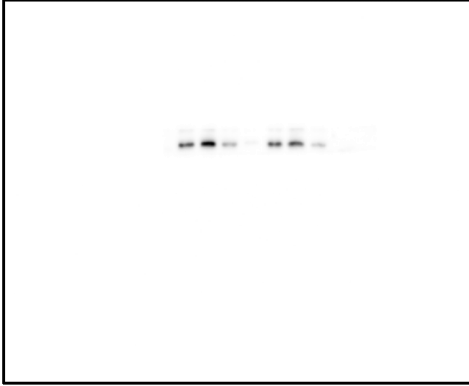

$\beta$ -actin(23)

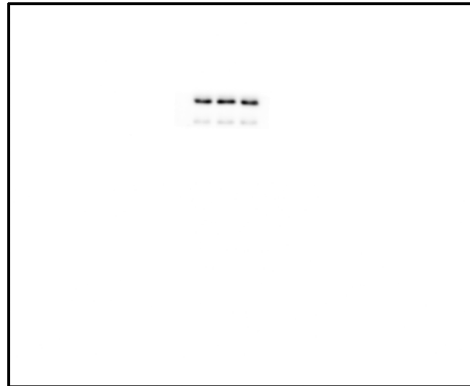

HepG2

MSL2(23)

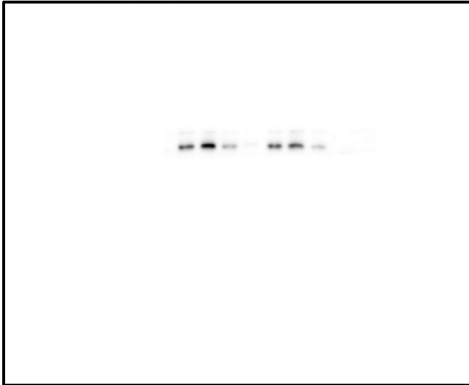

$\beta$ -actin(12)

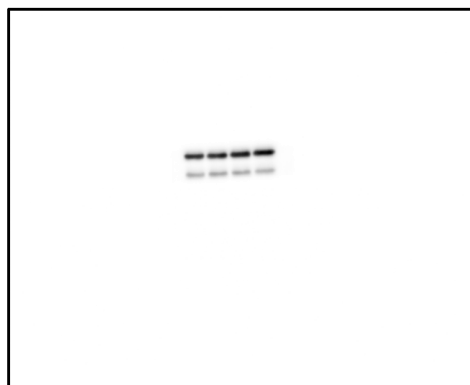

**Uncropped original picture of Western blot in Figure 4D**
